# Supplementary material
Source: Springer Nature journal article supplement (https://www.springermedizin.de/resource/supplementary/13063_2013_1957_MOESM1_ESM.pdf/9622054)
Supplement: MOESM1 [file 9622054]

### Phase 1. in 2 centres

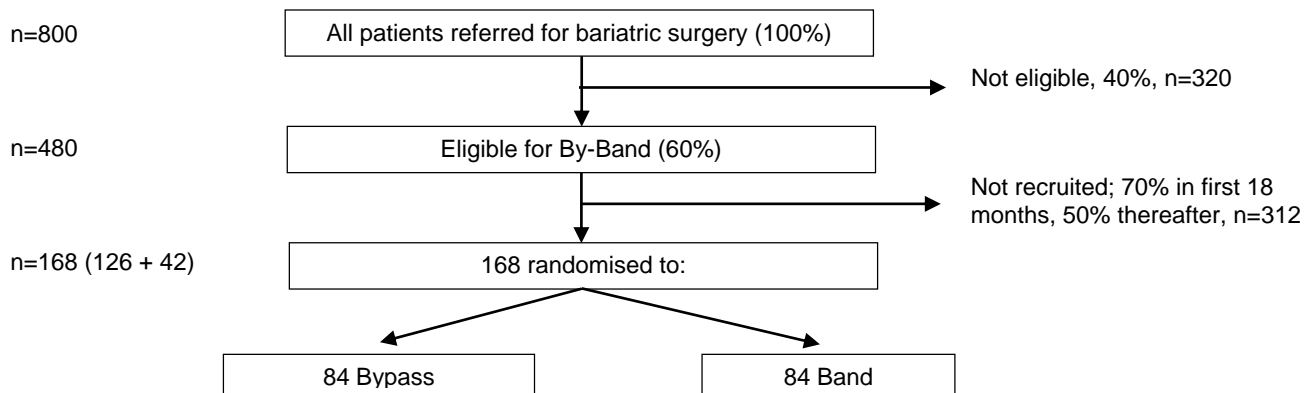

### Phase 2. in 8 centres

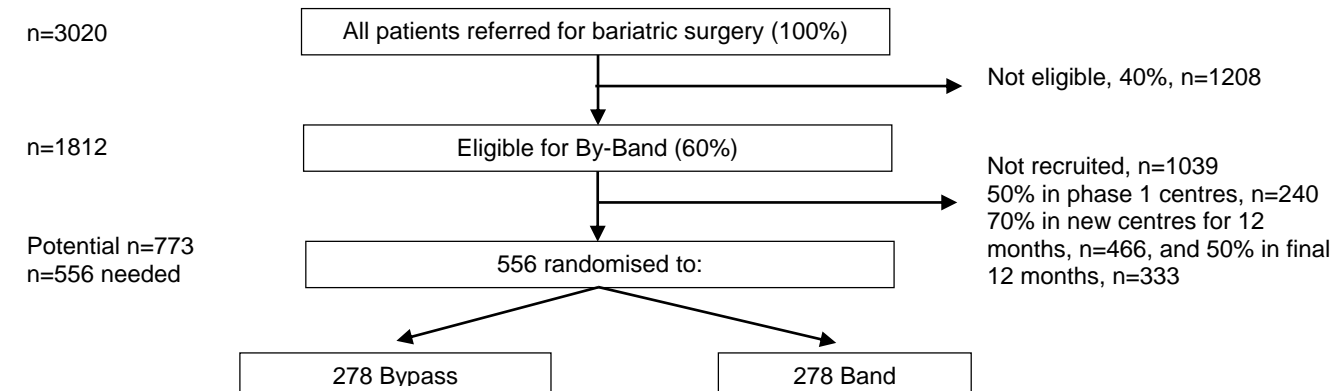

Phase 1 & 2 patients (168 + 556)  
followed up after surgery, n=724

85% followed to primary outcome, n=614  
in primary analyses at 3 years
